# Supplementary material for: Comparative mitogenomics of Cheiracanthium species (Araneae: Cheiracanthiidae) with phylogenetic implication and evolutionary insights
Source: PeerJ. 2025 Feb 14;13:e18314. doi: 10.7717/peerj.18314 (PMC11831973; doi:10.7717/peerj.18314)
Supplement: Supplemental Information 1 [file peerj-13-18314-s001.xlsx]

## Sheet: Table S1
Table S1 Detail collection information of nine newly sequence Cheiracanthium species
Species	Collect Information	Reference
Cheiracanthium brevispinum	China: Hebei Province, Baoding City, Baiyangdian, 12 June 2022	Zhang, F., Peng, J. Y. & Zhang, B. S. (2022). Spiders of Mt. Xiaowutai. Science Press, Beijing, 387 pp.
Cheiracanthium insigne	China: Yunnan Province, Xishangbanna, 12 July 2019	Li, Z. Y. & Zhang, F. (2024). A survey of cheiracanthiid spiders (Araneae: Cheiracanthiidae) from Hainan Island, China. Journal of Natural History 58(1-4): 167-188.
Cheiracanthium auriculatum_ZYL315	China: Hunan Province, Yongzhou City, Shuangpai County, Wuxingling Forest Farm, 29 April 2021	Zhang, J. S., Zhang, G. R. & Yu, H. (2018). Four species of spider genus Cheiracanthium C. L. Koch, 1839 (Araneae, Eutichuridae) from Jinggang Mountains, Jiangxi Province, China. ZooKeys 762: 33-45.
Cheiracanthium digitatum_ZYL318	China: Jiangxi Province, Ganzhou City, Chongyi County, Qiyunshan National Nature Reserve, 29 May 2021	Li, Z. Y. & Zhang, F. (2023). Five new species of the long-legged sac spider genus Cheiracanthium C.L. Koch, 1839 (Araneae: Cheiracanthiidae) from China. European Journal of Taxonomy 900: 81-105.
Cheiracanthium exquestitum_ZYL203	China: Hainan Province, Ledong County, Jianfengling National Nature Reserve, 18 July 2022	Li, Z. Y. & Zhang, F. (2024). A survey of cheiracanthiid spiders (Araneae: Cheiracanthiidae) from Hainan Island, China. Journal of Natural History 58(1-4): 167-188.
Cheiracanthium pichoni	China: Jiangxi Province, Ganzhou City, Chongyi County, Yangming Mountain Park, 28 May 2021	Zhu, M. S. & Zhang, B. S. (2011). Spider Fauna of Henan: Arachnida: Araneae. Science Press, Beijing, 558 pp.
Cheiracanthium solidum	China: Jiangxi Province, Ganzhou City, Chongyi County, Yangming Mountain Park, 28 May 2021	Zhang, G. R., Zhu, C. D. & Hu, Y. J. (1993). Three new species of spiders (Arachnida: Araneae) from China. Natural Enemies of Insects 15: 106-111.
Cheiracanthium_sp_ZYL314	China: Guangdong Province, Shaoguan City, Ruyuan County, Tianjingshan National Forest Park, 21 May 2021	–
Cheiracanthium taegense_ZYL137	China: Guangdong Province, Qingyuan City, Chaotian Tow, Dadongshan National Nature Reserve, 13 May 2021	Li, Z. Y. & Zhang, F. (2024). A survey of cheiracanthiid spiders (Araneae: Cheiracanthiidae) from Hainan Island, China. Journal of Natural History 58(1-4): 167-188.
