# Supplementary material for: Comparative mitogenomics of Cheiracanthium species (Araneae: Cheiracanthiidae) with phylogenetic implication and evolutionary insights
Source: PeerJ. 2025 Feb 14;13:e18314. doi: 10.7717/peerj.18314 (PMC11831973; doi:10.7717/peerj.18314)
Supplement: Supplemental Information 2 — Accession numbers with an asterisk (*) indicate newly obtained mitochondrial genome sequences in this study, nine newly sequenced species are in bold. [file peerj-13-18314-s002.xlsx]

## Sheet: Table S2
Table S2 Information of the representative taxa and accession numbers for the mitogenome sequences, with summary on the assembly and annotation results
Family	Species	SRA accession number	Mitogenomes accession number	Number of PCGs	Source
Agelenidae	Agelena_silvatica		NC033971	13	Zhu et al. 2017
Araneidae	Neoscona_nautica		NC029755	13	Wang et al. 2016
Araneidae	Trichonephila_clavata		NC008063	13	Pan et al. 2014
Atypidae	Atypus_karschi		MT832081	13	Direct Submission
Cheiracanthiidae	Cheiracanthium_auriculatum_ZYL315	*SRR28892202	*PQ615441,*PQ614312,*PQ614369,*PQ614400,*PQ614433,*PQ614466,*PQ614469,*PQ614525,*PQ614558,*PQ614589,*PQ614619,*PQ614652	12	This study
Cheiracanthiidae	Cheiracanthium_brevispinum	*SRR28892201	*OQ559338	13	This study
Cheiracanthiidae	Cheiracanthium_digitatum_ZYL318	*SRR28892200	*PQ614313,*PQ614401,*PQ614434,*PQ614526,*PQ614559,*PQ614590,*PQ614620,*PQ614653	8	This study
Cheiracanthiidae	Cheiracanthium_erraticum		MW832845	13	Li et al. 2022
Cheiracanthiidae	Cheiracanthium_eutittha_ZY01	DRR297701	*PQ615422,*PQ614295,*PQ614322,*PQ614350,*PQ614382,*PQ614414,*PQ614447,*PQ614470,*PQ614507,*PQ614539,*PQ614572,*PQ614603,*PQ614633	13	Arakawa et al. 2022
Cheiracanthiidae	Cheiracanthium_exquestitum_ZYL203	*SRR28892199	*PQ615439,*PQ614310,*PQ614337,*PQ614367,*PQ614398,*PQ614431,*PQ614464,*PQ614471,*PQ614523,*PQ614557,*PQ614588,*PQ614618,*PQ614650	13	This study
Cheiracanthiidae	Cheiracanthium_gracile_ZY02	DRR296639	*PQ615415,*PQ614287,*PQ614318,*PQ614343,*PQ614374,*PQ614406,*PQ614439,*PQ614472,*PQ614499,*PQ614531,*PQ614564,*PQ614595,*PQ614625	13	Arakawa et al. 2022
Cheiracanthiidae	Cheiracanthium_insigne	*SRR28892198	*OP785748	13	This study
Cheiracanthiidae	Cheiracanthium_japonicum_ZY03	DRR297414	*PQ614293,*PQ614321,*PQ614349,*PQ614380,*PQ614412,*PQ614445,*PQ614505,*PQ614537,*PQ614570,*PQ614601,*PQ614631	11	Arakawa et al. 2022
Cheiracanthiidae	Cheiracanthium_lascivum_ZY04	DRR296878	*PQ615416,*PQ614288,*PQ614344,*PQ614375,*PQ614407,*PQ614440,*PQ614473,*PQ614500,*PQ614532,*PQ614565,*PQ614596,*PQ614626	12	Arakawa et al. 2022
Cheiracanthiidae	Cheiracanthium_mildei_ZY05	SRR16201397	*PQ615423,*PQ614296,*PQ614323,*PQ614351,*PQ614383,*PQ614415,*PQ614448,*PQ614474,*PQ614508,*PQ614540,*PQ614573,*PQ614604,*PQ614634	13	Azevedo et al. 2022
Cheiracanthiidae	Cheiracanthium_pichoni	*SRR28892197	*OR726571	13	This study
Cheiracanthiidae	Cheiracanthium_solidum	*SRR28892196	*OR726570	13	This study
Cheiracanthiidae	Cheiracanthium_sp_ZY06	DRR296453	*PQ615414,*PQ614286,*PQ614317,*PQ614342,*PQ614373,*PQ614405,*PQ614438,*PQ614498,*PQ614530,*PQ614563,*PQ614594,*PQ614624	12	Arakawa et al. 2022
Cheiracanthiidae	Cheiracanthium_sp_ZY07	DRR297293	*PQ615420,*PQ614292,*PQ614320,*PQ614348,*PQ614379,*PQ614411,*PQ614444,*PQ614475,*PQ614504,*PQ614536,*PQ614569,*PQ614600,*PQ614630	13	Arakawa et al. 2022
Cheiracanthiidae	Cheiracanthium_sp_ZY08	DRR297093	*PQ615418,*PQ614290,*PQ614319,*PQ614346,*PQ614377,*PQ614409,*PQ614442,*PQ614476,*PQ614502,*PQ614534,*PQ614567,*PQ614598,*PQ614628	13	Arakawa et al. 2022
Cheiracanthiidae	Cheiracanthium_sp_ZY09	DRR297230	*PQ615419,*PQ614291,*PQ614347,*PQ614378,*PQ614410,*PQ614443,*PQ614477,*PQ614503,*PQ614535,*PQ614568,*PQ614599,*PQ614629	12	Arakawa et al. 2022
Cheiracanthiidae	Cheiracanthium_sp_ZYL314	*SRR28892195	*PQ615440,*PQ614311,*PQ614338,*PQ614368,*PQ614399,*PQ614432,*PQ614465,*PQ614478,*PQ614524,*PQ614651	10	This study
Cheiracanthiidae	Cheiracanthium_taegense_ZYL137	*SRR28892194	*PQ615438,*PQ614366,*PQ614430,*PQ614463,*PQ614479,*PQ614556,*PQ614587,*PQ614649	8	This study
Cheiracanthiidae	Cheiracanthium_triviale		MN334527	13	Tyagi et al. 2020
Cheiracanthiidae	Cheiracanthium_unicum_ZY10	DRR296920	*PQ615417,*PQ614289,*PQ614345,*PQ614376,*PQ614408,*PQ614441,*PQ614480,*PQ614501,*PQ614533,*PQ614566,*PQ614597,*PQ614627	12	Arakawa et al. 2022
Cheiracanthiidae	Eutittha_mordax_ZY11	DRR297612	*PQ615421,*PQ614294,*PQ614381,*PQ614413,*PQ614446,*PQ614506,*PQ614538,*PQ614571,*PQ614602,*PQ614632	10	Arakawa et al. 2022
Cheiracanthiidae	Macerio_flavus_ZY12	SRR16201483	*PQ615424,*PQ614297,*PQ614324,*PQ614352,*PQ614384,*PQ614416,*PQ614449,*PQ614483,*PQ614509,*PQ614541,*PQ614574,*PQ614605,*PQ614635	13	Azevedo et al. 2022
Corinnidae	Castianeira_sp_ZY30	SRR16201479	*PQ615411,*PQ614283,*PQ614314,*PQ614339,*PQ614370,*PQ614402,*PQ614435,*PQ614468,*PQ614495,*PQ614527,*PQ614560,*PQ614591,*PQ614621	13	Azevedo et al. 2022
Corinnidae	Ianduba_varia_ZY13	SRR16201477	*PQ615412,*PQ614284,*PQ614315,*PQ614340,*PQ614371,*PQ614403,*PQ614436,*PQ614482,*PQ614496,*PQ614528,*PQ614561,*PQ614592,*PQ614622	13	Azevedo et al. 2022
Ctenidae	Phoneutria_boliviensis		MZ902035	13	Direct Submission
Dictynidae	Argyroneta_aquatica		NC026863	13	Liu et al. 2014
Dysderidae	Harpactocrates_apennicola		NC044081	13	Pons & Bover 2019
Dysderidae	Parachtes_romandiolae		NC044099	13	Pons & Bover 2019
Euagridae	Phyxioschema_suthepium		NC020322	13	Unpublished
Liphistiidae	Liphistius_erawan		NC020323	13	Unpublished
Liphistiidae	Songthela_hangzhouensis		NC005924	13	Qiu et al. 2005
Lycosidae	Pardosa_laura		NC025223	13	Pan et al. 2014
Lycosidae	Wadicosa_fidelis		NC026123	13	Wang et al. 2014
Miturgidae	Miturga_albopunctata_ZY14	SRR16201440	*PQ615425,*PQ614298,*PQ614325,*PQ614353,*PQ614385,*PQ614417,*PQ614450,*PQ614484,*PQ614510,*PQ614542,*PQ614575,*PQ614606,*PQ614636	13	Azevedo et al. 2022
Miturgidae	Syspira_longipes_ZY15	SRR16201439	*PQ615426,*PQ614299,*PQ614326,*PQ614354,*PQ614386,*PQ614418,*PQ614451,*PQ614492,*PQ614511,*PQ614543,*PQ614576,*PQ614607,*PQ614637	13	Azevedo et al. 2022
Miturgidae	Zora_sp_ZY16	SRR16201438	*PQ615427,*PQ614327,*PQ614355,*PQ614387,*PQ614419,*PQ614452,*PQ614494,*PQ614512,*PQ614544,*PQ614577,*PQ614608,*PQ614638	12	Azevedo et al. 2022
Nemesiidae	Calisoga_longitarsis		NC010780	13	Masta & Boore 2008
Oxyopidae	Oxyopes_sertatus		NC025224	13	Pan et al. 2014
Philodromidae	Philodromus_insperatus_ZY17	SRR16201437	*PQ615428,*PQ614300,*PQ614328,*PQ614356,*PQ614388,*PQ614486,*PQ614513	7	Azevedo et al. 2022
Philodromidae	Tibellus_oblongus_ZY18	SRR16201436	*PQ615429,*PQ614301,*PQ614329,*PQ614357,*PQ614389,*PQ614420,*PQ614453,*PQ614493,*PQ614514,*PQ614545,*PQ614578,*PQ614609,*PQ614639	13	Azevedo et al. 2022
Pholcidae	Mesabolivar_sp_ITV1036I1		NC040859	13	Oliveira et al. 2018
Pholcidae	Pholcus_phalangioides		NC020324	13	Pan et al. 2014
Phrurolithidae	Phrurolithus_festivus_ZY19	SRR16201435	*PQ615430,*PQ614302,*PQ614330,*PQ614358,*PQ614390,*PQ614421,*PQ614454,*PQ614487,*PQ614515,*PQ614546,*PQ614579,*PQ614610,*PQ614640	13	Azevedo et al. 2022
Phrurolithidae	Scotinella_pugnata_ZY20	SRR16201433	*PQ615432,*PQ614304,*PQ614360,*PQ614392,*PQ614423,*PQ614456,*PQ614490,*PQ614517,*PQ614548,*PQ614581,*PQ614612,*PQ614642	12	Azevedo et al. 2022
Phrurolithidae	Phrurotimpus_sp_ZY21	SRR16201434	*PQ615431,*PQ614303,*PQ614331,*PQ614359,*PQ614391,*PQ614422,*PQ614455,*PQ614488,*PQ614516,*PQ614547,*PQ614580,*PQ614611,*PQ614641	13	Azevedo et al. 2022
Prodidomidae	Chileuma_serena_ZY22	SRR16201432	*PQ615433,*PQ614305,*PQ614332,*PQ614361,*PQ614393,*PQ614424,*PQ614457,*PQ614481,*PQ614518,*PQ614549,*PQ614613,*PQ614643	12	Azevedo et al. 2022
Prodidomidae	Moreno_sp_ZY23	SRR16201427	*PQ615434,*PQ614306,*PQ614333,*PQ614362,*PQ614394,*PQ614425,*PQ614458,*PQ614485,*PQ614519,*PQ614550,*PQ614582,*PQ614614,*PQ614644	13	Azevedo et al. 2022
Prodidomidae	Prodidomus_flavipes_ZY24	SRR16201426	*PQ615435,*PQ614307,*PQ614334,*PQ614363,*PQ614395,*PQ614426,*PQ614459,*PQ614489,*PQ614520,*PQ614551,*PQ614583,*PQ614615,*PQ614645	13	Azevedo et al. 2022
Salticidae	Carrhotus_xanthogramma		NC027492	13	Fang et al. 2016
Salticidae	Cheliceroides_longipalpis		NC041120	13	Chen et al. 2018
Salticidae	Epeus_alboguttatus		NC042829	13	Yang et al. 2018
Selenopidae	Anyphops_barbertonensis_ZY25	SRR16201417	*PQ615436,*PQ614308,*PQ614335,*PQ614364,*PQ614396,*PQ614427,*PQ614460,*PQ614467,*PQ614521,*PQ614552,*PQ614584,*PQ614646	12	Azevedo et al. 2022
Selenopidae	Selenops_bursarius		NC024878	13	Pan et al. 2014
Selenopidae	Selenops_sp_ZY26	SRR16201416	*PQ615437,*PQ614309,*PQ614336,*PQ614365,*PQ614397,*PQ614491,*PQ614522,*PQ614553,*PQ614616	9	Azevedo et al. 2022
Tetragnathidae	Tetragnatha_maxillosa		NC025775	13	Wang et al. 2016
Tetragnathidae	Tetragnatha_nitens		NC028068	13	Wang et al. 2016
Theraphosidae	Cyriopagopus_schmidti		NC005925	13	Qiu et al. 2005
Thomisidae	Oxytate_striatipes		NC025557	13	Kim et al. 2014
Trochanteriidae	Plator_insolens		OM397542	13	Ding et al. 2022
Viridasiidae	Vulsor_sp_ZY27	DRR168633	*PQ615413,*PQ614285,*PQ614316,*PQ614341,*PQ614372,*PQ614404,*PQ614437,*PQ614497,*PQ614529,*PQ614562,*PQ614593,*PQ614623	12	Arakawa et al. 2022
Xenoctenidae	Odo_sp_ZY28	SRR16201398	*PQ614428,*PQ614461,*PQ614554,*PQ614585,*PQ614647	5	Azevedo et al. 2022
Xenoctenidae	Xenoctenus_sp_ZY29	SRR16201396	*PQ614429,*PQ614462,*PQ614555,*PQ614586,*PQ614617,*PQ614648	6	Azevedo et al. 2022
note: Accession numbers with an asterisk (*) indicate newly obtained mitochondrial genome sequences in this study, nine newly sequenced species are in bold
