# Supplementary material for: Comparative mitogenomics of Cheiracanthium species (Araneae: Cheiracanthiidae) with phylogenetic implication and evolutionary insights
Source: PeerJ. 2025 Feb 14;13:e18314. doi: 10.7717/peerj.18314 (PMC11831973; doi:10.7717/peerj.18314)
Supplement: Supplemental Information 3 — The numbers at the nodes separated by “/” indicate the C. brevispinum, C. insigne, C. pichoni, and C. solidum. IGN represents (+) values as intergenic nucleotides and (-) values as overlapping regions. J refers to the major strand; N refers to the minor strand. [file peerj-13-18314-s003.xlsx]

## Sheet: Table S3
Table S3. Mitochondrial genome organization of Cheiracanthium brevispinum, C. insigne, C. pichoni and C. solidum
Gene	Position (bp)	Size(bp)	Intergenic nucleotides (IGN)	Codon
				Start	Stop	Strand
	C. brevispinum/C .insigne/C. pichoni/C. solidum	C. brevispinum/C .insigne/C. pichoni/C. solidum	C. brevispinum/C .insigne/C. pichoni/C. solidum	C. brevispinum/C .insigne/C. pichoni/C. solidum	C. brevispinum/C .insigne/C. pichoni/C. solidum	C. brevispinum/C .insigne/C. pichoni/C. solidum
trnM	1–51/1–69/1–54/1–65	51/69/54/65	0/0/0/0			J/J/J/J
nad2	48–999/66–1008/53–1012/75–1006	952/943/960/932	-4/-4/-2/9	ATT/ATA/ATA/ATA	T/T/TAA/TA	J/J/J/J
trnW	1000–1053/1009–1062/1015–1071/1006–1059	54/54/57/54	0/0/2/-1			J/J/J/J
trnY	1004–1084/1013–1088/1045–1099/1037–1096	81/76/55/60	-50/-50/-27/-23			N/N/N/N
trnC	1060–1112/1069–1130/1074–1131/1068–1125	53/62/58/58	-25/-20/-26/-29			N/N/N/N
cox1	1118–2656/1128–2665/1131–2669/1125–2664	1539/1538/1539/1540	5/-3/-1/-1	ATA/ATA/ATA/ATA	TAA/TA/TAA/T	J/J/J/J
cox2	2657–3319/2666–3328/2670–3332/2663–3325	663/663/663/663	0/0/0/-2	TTG/TTG/TTG/TTG	TAA/TAA/TAA/TAG	J/J/J/J
trnK	3320–3378/3327–3389/3331–3391/3324–3386	59/63/61/63	0/-2/-2/-2			J/J/J/J
trnD	3361–3416/3372–3424/3377–3433/3369–3423	56/53/57/55	-18/-18/-15/-18			J/J/J/J
atp8	3409–3567/3432–3578/3434–3580/3429–3575	159/147/147/147	-8/7/0/5	ATT/ATA/ATA/ATA	TAA/TAA/TAA/TAA	J/J/J/J
atp6	3567–4229/3578–4240/3574–4242/3569–4237	663/663/669/669	-1/-1/-7/-7	ATA/ATA/ATG/ATG	TAA/TAA/TAA/TAA	J/J/J/J
cox3	4233–5018/4244–5029/4247–5030/4241–5026	786/786/784/786	3/3/4/3	TTG/TTG/TTG/TTG	TAA/TAA/T/TAA	J/J/J/J
trnG	5024–5073/5033–5072/5029–5090/5026–5085	50/40/62/60	5/3/-2/-1			J/J/J/J
nad3	5077–5418/5088–5429/5091–5400/5101–5395	342/342/310/295	3/15/0/15	ATT/ATT/ATT/ATA	TAA/TAA/T/T	J/J/J/J
trnL2	5389–5446/5400–5457/5403–5460/5398–5455	58/58/58/58	-30/-30/2/2			N/N/N/N
trnN	5442–5515/5452–5526/5456–5508/5451–5526	74/75/53/76	-5/-6/-5/-5			J/J/J/J
trnA	5558–5616/5567–5625/5596–5652/5572–5626	59/59/57/55	42/40/87/45			J/J/J/J
trnS1	5612–5665/5623–5672/5650–5710/5629–5683	54/50/61/55	-5/-3/-3/2			J/J/J/J
trnR	5658–5708/5671–5738/5701–5761/5689–5774	51/68/61/86	-8/-2/-10/5			J/J/J/J
trnE	5702–5766/5717–5773/5749–5803/5744–5801	65/57/55/58	-7/-22/-13/-31			J/J/J/J
trnF	5728–5795/5749–5805/5782–5839/5769–5833	68/57/58/65	-39/-25/-22/-33			N/N/N/N
nad5	5796–7425/5806–7441/5840–7460/5854–7485	1630/1636/1621/1632	0/0/0/20	ATA/ATA/ATA/ATA	T/T/T/TAA	N/N/N/N
trnH	7431–7483/7445–7497/7467–7527/7492–7542	53/53/61/51	5/3/6/6			N/N/N/N
nad4	7486–8778/7498–8785/7533–8819/7541–8824	1293/1288/1287/1284	2/0/5/-2	TTG/ATG/ATA/ATA	TAA/T/TAA/TAA	N/N/N/N
nad4L	8666–9028/8682–9041/8776–9078/8781–9086	363/360/303/306	-113/-104/-44/-44	ATA/ATT/ATA/ATT	TAA/TAA/TAA/TAA	N/N/N/N
trnP	9037–9092/9044–9099/9081–9137/9087–9144	56/56/57/58	8/2/2/0			N/N/N/N
nad6	9105–9533/9112–9538/9159–9586/9155–9581	429/427/428/427	12/12/21/10	ATA/ATA/ATA/ATA	TAA/T/TA/T	J/J/J/J
trnI	9534–9587/9539–9596/9586–9644/9582–9642	54/58/59/61	0/0/-1/0			J/J/J/J
cytb	9588–10724/9597–10722/9645–10767/9643–10765	1137/1126/1123/1123	0/0/0/0	ATA/ATA/ATA/ATT	TAG/T/T/T	J/J/J/J
trnS2	10717–10769/10723–10777/10771–10825/10766–10821	53/55/55/56	-8/0/3/0			J/J/J/J
trnT	10770–10830/10778–10836/10824–10879/10822–10876	61/59/56/55	0/0/-2/0			J/J/J/J
nad1	10815–11708/10825–11718/10886–11771/10877–11768	894/894/886/892	-16/-12/6/0	ATT/ATT/ATA/ATC	TAA/TAA/T/T	N/N/N/N
trnL1	11733–11786/11727–11794/11774–11841/11775–11838	54/68/68/64	24/8/2/6			N/N/N/N
rrnL	11799–12715/11807–12807/11819–12855/11818–12862	917/1001/1037/1045	12/12/-23/-21			N/N/N/N
trnV	12790–12849/12808–12866/12846–12913/12861–12917	60/59/68/57	74/0/-10/-2			N/N/N/N
rrnS	12850–13565/12867–13549/12908–13617/12912–13600	716/683/710/689	0/0/-6/-6			N/N/N/N
trnQ	13528–13591/13550–13614/13595–13661/13601–13663	64/65/67/63	-38/0/-23/0			N/N/N/N
Control region	13592–14703/13615–14598/13662–14666/13664–15185	1112/984/1005/1522	0/0/0/0
Note: The numbers at the nodes separated by “/” indicate the C. brevispinum, C. insigne, C. pichoni and C. solidum. IGN represents (+) values as intergenic nucleotides and (-) values as overlapping regions. J refers to the major strand; N refers to the minor strand.
