# Supplementary material for: Comparative mitogenomics of Cheiracanthium species (Araneae: Cheiracanthiidae) with phylogenetic implication and evolutionary insights
Source: PeerJ. 2025 Feb 14;13:e18314. doi: 10.7717/peerj.18314 (PMC11831973; doi:10.7717/peerj.18314)
Supplement: Supplemental Information 4 — The numbers at the nodes separated by “/” indicate the C. brevispinum, C. insigne, C. pichoni, and C. solidum. J refers to the major strand; N refers to the minor strand. [file peerj-13-18314-s004.xlsx]

## Sheet: Table S4
Table S4. Base composition and skewness of mitogenomes of Cheiracanthium brevispinum, C. insigne, C. pichoni and C. solidum
Regions	Strand	Size (bp)	T(U)	C	A	G	AT(%)	GC(%)	GT(%)	AT skew	GC skew
		C. brevispinum/C .insigne/C. pichoni/C. solidum	C. brevispinum/C .insigne/C. pichoni/C. solidum	C. brevispinum/C .insigne/C. pichoni/C. solidum	C. brevispinum/C .insigne/C. pichoni/C. solidum	C. brevispinum/C .insigne/C. pichoni/C. solidum	C. brevispinum/C .insigne/C. pichoni/C. solidum	C. brevispinum/C .insigne/C. pichoni/C. solidum	C. brevispinum/C .insigne/C. pichoni/C. solidum	C. brevispinum/C .insigne/C. pichoni/C. solidum	C. brevispinum/C .insigne/C. pichoni/C. solidum
PCGs	all	10848/10806/10713/10689	44/43.4/44.0/43.6	10.4/10.5/10.1/10.3	34/34.2/34.7/34.8	11.6/11.8/11.2/11.3	78/77.6/78.7/78.4	22/22.3/21.3/21.6	55.6/55.2/55.2/54.9	-0.129/-0.118/-0.118/-0.112	0.052/0.057/0.051/0.048
PCGs	J	6669/6630/6618/6576	46.5/46.3/46.2/45.6	8.4/8.6/8.7/8.4	30.8/30.9/31.5/32.1	14.2/14.2/13.6/13.8	77.3/77.2/77.7/77.7	22.6/22.8/22.3/22.2	60.7/60.5/59.8/59.4	-0.203/-0.2/-0.189/-0.173	0.255/0.247/0.218/0.243
PCGs	N	4179/4176/4095/4113	40/38.7/40.5/40.3	13.6/13.6/12.3/13.3	39/39.6/39.9/39.0	7.4/8/7.3/7.3	79/78.3/80.4/79.3	21/21.6/19.6/20.6	47.4/46.7/47.8/47.6	-0.012/0.012/-0.008/-0.017	-0.297/-0.26/-0.257/-0.289
PCGs-1st	all	3616/3602/3571/3563	36.2/35/36.0/35.5	9.8/9.8/9.5/9.7	35.8/36.3/36.5/36.5	18.2/18.9/18.0/18.2	72/71.3/72.5/72.0	28/28.7/27.5/27.9	54.4/53.9/54.0/53.7	-0.005/0.018/0.007/0.014	0.298/0.318/0.305/0.307
PCGs-1st	J	2223/2210/2206/2192	38.4/37.7/38.3/37.5	9.2/9.3/9.5/9.0	30.5/30.7/30.7/31.8	21.9/22.3/21.5/21.7	68.9/68.4/69.0/69.3	31.1/31.6/31.0/30.7	60.3/60/59.8/59.2	-0.114/-0.102/-0.110/-0.082	0.409/0.41/0.386/0.412
PCGs-1st	N	1393/1392/1365/1371	32.6/30.8/32.2/32.4	10.9/10.5/9.6/10.7	44.1/45.1/45.9/44.1	12.3/13.6/12.2/12.8	76.7/75.9/78.1/76.5	23.2/24.1/21.8/23.5	44.9/44.4/44.4/45.2	0.151/0.188/0.175/0.153	0.062/0.128/0.121/0.087
PCGs-2nd	all	3616/3602/3571/3563	50.1/49.7/50.1/50.1	17.1/17.4/17.1/17.1	20.2/20.2/20.2/20.3	12.5/12.7/12.6/12.5	70.3/69.9/70.3/70.4	29.6/30.1/29.7/29.6	62.6/62.4/62.7/62.6	-0.424/-0.422/-0.425/-0.424	-0.156/-0.153/-0.154/-0.155
PCGs-2nd	J	2223/2210/2206/2192	49.8/50.4/50.0/50.1	15.2/14.8/14.8/14.7	20/20.1/20.5/20.6	14.9/14.7/14.7/14.6	69.8/70.5/70.5/70.7	30.1/29.5/29.5/29.3	64.7/65.1/64.7/64.7	-0.427/-0.43/-0.418/-0.418	-0.012/-0.005/-0.003/-0.002
PCGs-2nd	N	1393/1392/1365/1371	50.5/48.6/50.3/50.2	20.2/21.3/20.9/20.9	20.6/20.4/19.8/19.8	8.8/9.6/9.1/9.1	71.1/69/70.1/70.0	29/30.9/30.0/30.0	59.3/58.2/59.4/59.3	-0.42/-0.409/-0.435/-0.435	-0.395/-0.378/-0.394/-0.393
PCGs-3rd	all	3616/3602/3571/3563	45.8/45.4/46.1/45.0	4.3/4.5/3.6/4.1	45.9/46.3/47.4/47.6	4/3.8/2.9/3.3	91.7/91.7/93.5/92.6	8.3/8.3/6.5/7.4	49.8/49.2/49.0/48.3	0.002/0.009/0.015/0.027	-0.037/-0.083/-0.095/-0.118
PCGs-3rd	J	2223/2210/2206/2192	51.4/50.9/50.4/49.2	0.9/1.6/1.8/1.6	41.9/41.8/43.4/44.1	5.8/5.7/4.4/5.2	93.3/92.7/93.8/93.3	6.7/7.3/6.2/6.8	57.2/56.6/54.8/54.4	-0.101/-0.099/-0.074/-0.055	0.745/0.556/0.431/0.541
PCGs-3rd	N	1393/1392/1365/1371	36.8/36.6/39.1/38.4	9.8/9.1/6.4/8.2	52.3/53.4/53.9/53.2	1.1/0.9/0.5/0.1	89.1/90/93.0/91.6	10.9/10/6.9/8.3	37.9/37.5/39.6/38.5	0.173/0.186/0.159/0.161	-0.803/-0.827/-0.853/-0.965
atp6	J	663/663/669/669	46.9/47.1/45.6/46.3	9/9.7/9.7/8.7	30.3/30/31.8/31.5	13.7/13.3/12.9/13.5	77.2/77.1/77.4/77.8	22.7/23/22.6/22.2	60.6/60.4/58.5/59.8	-0.215/-0.221/-0.178/-0.190	0.205/0.158/0.139/0.216
atp8	J	159/147/147/147	49.1/46.3/45.6/44.9	5.7/4.8/5.4/3.4	40.3/42.2/44.2/47.6	5/6.8/4.8/4.1	89.4/88.5/89.8/92.5	10.7/11.6/10.2/7.5	54.1/53.1/50.4/49.0	-0.099/-0.046/-0.015/0.029	-0.059/0.176/-0.067/0.091
cox1	J	1539/1538/1539/1540	44.2/44.1/45.2/44.9	11.2/11.4/11.2/10.9	28.6/28/27.7/28.7	16/16.4/15.9/15.5	72.8/72.1/72.9/73.6	27.2/27.8/27.1/26.4	60.2/60.5/61.1/60.4	-0.214/-0.223/-0.241/-0.220	0.174/0.182/0.170/0.174
cox2	J	663/663/663/663	43.6/42.8/42.4/42.4	9/9.5/9.0/9.7	31.5/32.7/34.4/33.5	15.8/14.9/14.2/14.5	75.1/75.5/76.8/75.9	24.8/24.4/23.2/24.2	59.4/57.7/56.6/56.9	-0.161/-0.134/-0.104/-0.117	0.273/0.222/0.221/0.200
cox3	J	786/786/784/786	45.8/44.5/44.5/43.1	9.7/9.8/10.1/9.9	29.5/30.3/30.4/32.6	15/15.4/15.1/14.4	75.3/74.8/74.9/75.7	24.7/25.2/25.2/24.3	60.8/59.9/59.6/57.5	-0.216/-0.19/-0.189/-0.139	0.216/0.222/0.198/0.183
cytb	J	1137/1126/1123/1123	47.8/48.8/48.4/47.6	9.1/9.1/9.7/9.2	28.2/27.4/28.1/29.4	15/14.6/13.8/13.9	76/76.2/76.5/77.0	24.1/23.7/23.5/23.1	62.8/63.4/62.2/61.5	-0.257/-0.281/-0.264/-0.236	0.245/0.228/0.174/0.205
nad1	N	894/894/886/892	42.1/39.8/41.3/41.7	12.3/13.2/11.2/11.7	36.8/37.5/38.1/37.6	8.8/9.5/9.4/9.1	78.9/77.3/79.4/79.3	21.1/22.7/20.6/20.8	50.9/49.3/50.7/50.8	-0.067/-0.03/-0.040/-0.052	-0.164/-0.163/-0.088/-0.124
nad2	J	952/943/960/932	49.5/48.1/47.3/45.6	4.4/4.5/5.1/4.9	33.9/35.3/37.4/36.8	12.2/12.1/10.2/12.7	83.4/83.4/84.7/82.4	16.6/16.6/15.3/17.6	61.7/60.2/57.5/58.3	-0.186/-0.154/-0.117/-0.107	0.468/0.462/0.333/0.439
nad3	J	342/342/310/295	50/50/50.6/50.8	5.8/5/5.8/4.7	32.7/33.3/31.9/33.9	11.4/11.7/11.6/10.5	82.7/83.3/82.5/84.7	17.2/16.7/17.4/15.2	61.4/61.7/62.2/61.3	-0.208/-0.2/-0.227/-0.200	0.322/0.404/0.333/0.378
nad4	N	1293/1288/1287/1284	40.3/40/41.8/41.2	14/14.1/12.5/14.1	39.1/38.4/39.2/38.2	6.6/7.5/6.5/6.5	79.4/78.4/81.0/79.4	20.6/21.6/19.0/20.6	46.9/47.5/48.3/47.7	-0.015/-0.021/-0.033/-0.037	-0.361/-0.305/-0.314/-0.371
nad4L	N	363/360/303/306	41/40.8/38.6/40.2	10.2/10/10.6/10.8	43/41.9/44.9/42.2	5.8/7.2/5.9/6.9	84/82.7/83.5/82.4	16/17.2/16.5/17.7	46.8/48/44.5/47.1	0.023/0.013/0.075/0.024	-0.276/-0.161/-0.280/-0.222
nad5	N	1630/1636/1621/1632	38.3/36.7/39.5/39.0	14.8/14.3/13.1/14.0	39.2/41.3/40.4/39.8	7.6/7.8/7.0/7.2	77.5/78/79.9/78.8	22.4/22.1/20.1/21.2	45.9/44.5/46.5/46.2	0.011/0.059/0.011/0.011	-0.322/-0.296/-0.305/-0.324
nad6	J	429/427/428/427	47.1/48.5/49.1/48.5	4.4/5.2/3.5/4.2	35.9/33.7/33.6/33.0	12.6/12.6/13.8/14.3	83/82.2/82.7/81.5	17/17.8/17.3/18.5	59.7/61.1/62.9/62.8	-0.135/-0.179/-0.186/-0.190	0.479/0.421/0.595/0.544
rrnL	N	917/1001/1037/1045	37/38.6/37.4/37.1	11/9.7/9.5/9.9	42.7/43.4/44.1/44.7	9.3/8.4/9.1/8.3	79.7/82/81.5/81.8	20.3/18.1/18.6/18.2	46.3/47/46.5/45.4	0.073/0.059/0.082/0.092	-0.086/-0.072/-0.021/-0.084
rrnS	N	716/683/710/689	35.9/35.7/36.5/36.7	9.9/9.8/9.4/8.7	44.4/44.9/43.9/45.0	9.8/9.5/10.1/9.6	80.3/80.6/80.4/81.7	19.7/19.3/19.5/18.3	45.7/45.2/46.6/46.3	0.106/0.114/0.093/0.101	-0.007/-0.015/0.036/0.048
rRNAs	all	1633/1684/1747/1734	36.5/37.4/37.0/37.0	10.5/9.7/9.4/9.4	43.5/44/44.0/44.8	9.5/8.8/9.5/8.8	80/81.4/81.0/81.8	20/18.5/18.9/18.2	46/46.2/46.5/45.8	0.087/0.081/0.086/0.096	-0.052/-0.048/0.003/-0.032
rRNAs	N	1633/1684/1747/1734	36.5/37.4/37.0/37.0	10.5/9.7/9.4/9.4	43.5/44/44.0/44.8	9.5/8.8/9.5/8.8	80/81.4/81.0/81.8	20/18.5/18.9/18.2	46/46.2/46.5/45.8	0.087/0.081/0.086/0.096	-0.052/-0.048/0.003/-0.032
tRNAs	all	1288/1314/1298/1333	37.3/37.7/38.8/37.7	9.3/9/7.6/8.6	40.5/39.8/42.0/40.8	12.9/13.5/11.6/12.9	77.8/77.5/80.8/78.5	22.2/22.5/19.2/21.5	50.2/51.2/50.4/50.6	0.042/0.026/0.040/0.040	0.161/0.2/0.208/0.199
tRNAs	J	741/760/748/799	38.6/38.8/39.8/38.7	8.9/8.4/7.0/8.3	37.5/37.8/40.1/38.9	15/15/13.1/14.1	76.1/76.6/79.9/77.6	23.9/23.4/20.1/22.4	53.6/53.8/52.9/52.8	-0.014/-0.014/0.003/0.003	0.254/0.281/0.307/0.263
tRNAs	N	547/554/550/534	35.5/36.3/37.3/36.1	9.9/9.7/8.5/9.2	44.6/42.6/44.5/43.6	10.1/11.4/9.6/11.0	80.1/78.9/81.8/79.7	20/21.1/18.1/20.2	45.6/47.7/46.9/47.1	0.114/0.08/0.089/0.094	0.009/0.077/0.060/0.093
Full genome		14703/14598/14666/15185	43.1/43.2/43.2/42.7	8.6/8.9/8.4/8.5	34.7/34.7/36.0/36.0	13.5/13.2/12.4/12.8	77.8/77.9/79.2/78.7	22.1/22.1/20.8/21.3	56.6/56.4/55.6/55.5	-0.107/-0.109/-0.091/-0.085	0.223/0.192/0.189/0.199
Note: The numbers at the nodes separated by “/” indicate the C. brevispinum, C. insigne, C. pichoni and C. solidum. J refers to the major strand; N refers to the minor strand.
